# Supplementary material for: Differential sensing with arrays of de novo designed peptide assemblies
Source: Springer Nature journal article supplement (doi:10.1038/s41467-023-36024-y), 2023-01-24
Supplement: MOESM3 [file 41467_2023_36024_MOESM3_ESM.pdf]

**Descriptions of additional supplementary files**

**Supplementary Data File 1:**

Sequences and associated data of all de novo designed alphaHBs used in this study

**Supplementary Data File 2:**

Merging and refinement statistics for the new X-ray crystal structures from this study
